# Supplementary material
Source: PubMed Central journal article supplement (PMC6612266)

Suppl Figure S1

A

ML-A Classical nevus

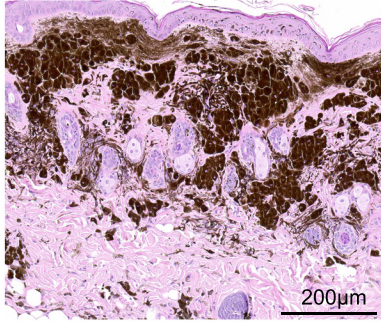

ML-B Cellular nevus

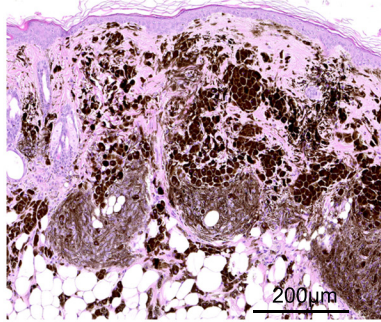

ML-C Cellular nevus

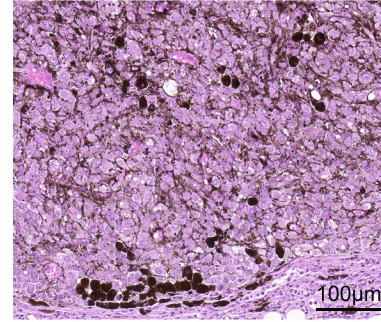

ML-D Melanoma (epithelioid)

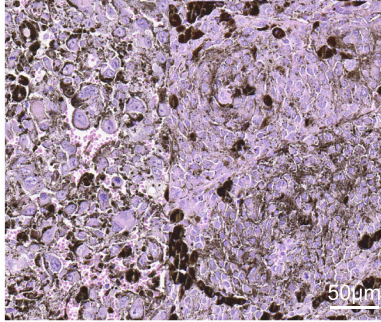

ML-D Melanoma (spindloid)

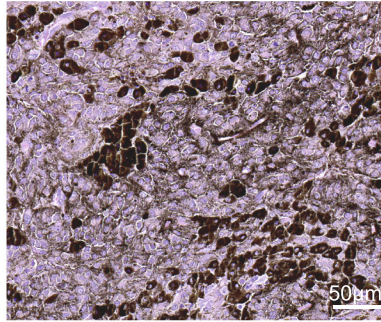

ML-D Melanoma (neuroendocrine pattern)

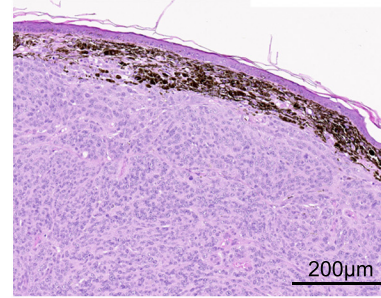

ML-D Melanoma (neuroendocrine pattern)

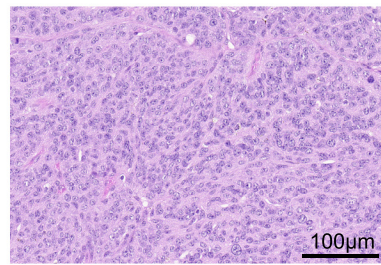

Dermatopathic lymphadenopathy

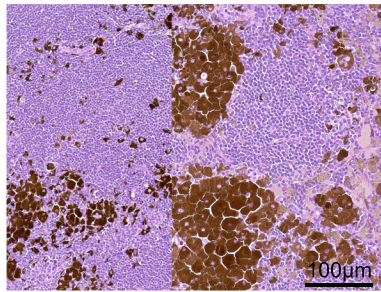

Dermatopathic lymphadenopathy

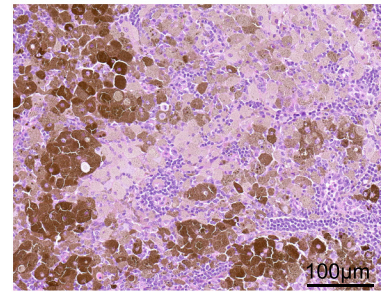

B

Validation of hmedIP-seq targets

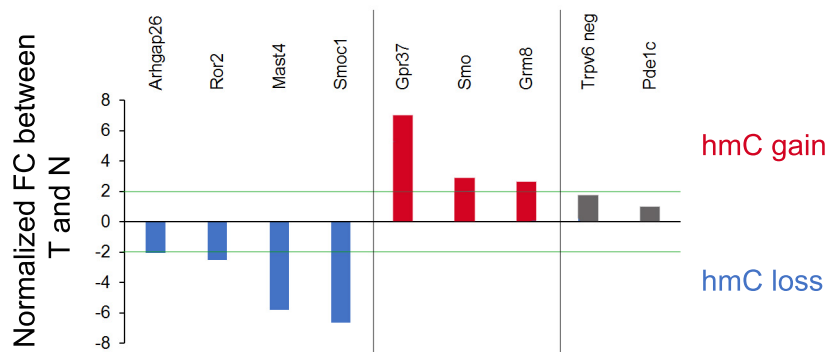

DhmR between T and N by hmedIP-seq

hmC loss

hmC gain

negative Ctl

A

| Sequences of primers for RT-qPCR    |                           |                           |
|-------------------------------------|---------------------------|---------------------------|
| Gene name                           | 5'-3' sequence of Forward | 5'-3' sequence of Reverse |
| Tet1                                | GAGCCTGTTCCTCGATGTGG      | CAAACCCACCTGAGGCTGTT      |
| Tet2                                | GTCAACAGGACATGATCCAGGAG   | CCTGTTCCATCAGGCTTGCT      |
| Tet3                                | CCGGATTGAGAAGGTCACTAC     | AAGATAACAATCACGGCGTTCT    |
| Pten                                | CTTTTCTTCAGCCACAGGCTC     | GTCTTTCTGCAGGAAATCCCAT    |
| p15                                 | AGATCCCAACGCCCTGAAC       | CCCATCATCATGACCTGGATT     |
| p16                                 | GTGTGCATGACGTGCCGG        | ACGTGAACGTTGCCCATCAT      |
| p19                                 | GATCTTGAGAAGAGGGCCGC      | TCATGACCGTAGTTGAGCAG      |
| Tyr                                 | TGACAAAGCCAAAACCCCA       | TGGACTGGCAAATCCTTCCA      |
| S100a6                              | CACATTCCATCCCTCGACC       | GTGGAAGATGGCCACGAGAA      |
| Mitf                                | GCCTTGTTTATGGTGCCTTC      | GTCTCTCCCTCTACTTTCCTGT    |
| Trp53                               | AACCGCCGACCTATCCTTAC      | CTTCTGTACGGGGTCTCTC       |
| p21                                 | TTGTGCTGTCTTGCCTCT        | TAGAAATCTGTCAGGCTGGTCT    |
| Brn2                                | CGGCGGTTTGCTCTATTC        | ATGGTGTGGCTCATCGTG        |
| Pax3                                | GGGCAGAATTACCCACGAC       | CGGATATGGTTGGCCAGAGG      |
| Sox10                               | CTAGCCGACCAGTACCCTCA      | GGCGCTTGTCACTTTCGTTTC     |
| Gm12610                             | TACAACAGTCTGCTCCAGCG      | ACTTCTGCAAAACGACGAT       |
| Sdha                                | AAGGCAATGCTGGAGAAGA       | TGGTCTGCATCGACTTCTG       |
| Hprt                                | GTAATGATCAGTCAACGGGGAC    | CCAGCAAGCTTGAACCTTAACCA   |
| Actin                               | TGACCTGAAAGTACCCCATGA     | CCATGTCGTCACGTTGGTAAC     |
| Gapdh                               | CCTCGTCCCGTAGACAAAATG     | TGAAGGGTCTGTTGATGGC       |
| Sequences of primers for hmedIP-PCR |                           |                           |
| Gene name                           | 5'-3' sequence of Forward | 5'-3' sequence of Reverse |
| Smo                                 | ACCAGACAACAGGATGCCTT      | CTGGGAAAAGAAACACGCA       |
| Grm8                                | AAGCCTCACCAGTTCATCCC      | GCTCAGAAAAGGGAGAGTCCA     |
| Mast4                               | AGATTCCTCGGGCTTGTGG       | GTACCCGGGAACACATCCAG      |
| Smoc1                               | TGGTTATGGCCGTAGTCAGC      | CGGAAGGTCAGAGGAGAACC      |
| Pde1c                               | ACTAAGGTGGGTAAGGGACA      | GGAAAGAGGGCTTGAGGCTT      |
| Hdac9                               | GCTGGGTCACTCTAGCCTG       | AGAAGCGTCTTGTCAACCAT      |
| Arhgap26                            | TACTTCCCACGTGAACCCAG      | ACTTGGATGCTGGACCACTG      |
| Ror2                                | TCCTGAGGAAGCCCAAGAAAGC    | GCCTTGCTTGGGAGAACTGAAA    |
| Rad51b                              | TGGCCCTGTTGTGATCTGAC      | GCCACCGCCTACTAATCAT       |
| Gpr37                               | TCAAGCCCTGAGATTTGTGA      | CAAGCAACAGACAGGTGTGC      |
| Chr6 neg Ctl                        | TCACATGTTTGCATGCTGCC      | ACCTGCTGTGATGATGGACC      |
| Trpv6                               | AAACGTGTCCCTCAGTGTCCA     | TGTTGCCCTTGCACTACTTT      |
| Il131ra                             | GTACCCCAAGAGCTCATGTC      | AGTTTGAAGACCAAGGGGT       |
| Kdm2a                               | CCCTGTAACCTCCACAGGTC      | AAAGCAACACTTGTCTGATGA     |
| Peak1                               | GACCAGTGGATAGGCTGTTT      | AGACTCTTACCTTGAGGCAC      |
| h SON (spike)                       | GCACAGGAGCTGCCTACTA       | ATATGGGATTTGGGGCCATC      |

B

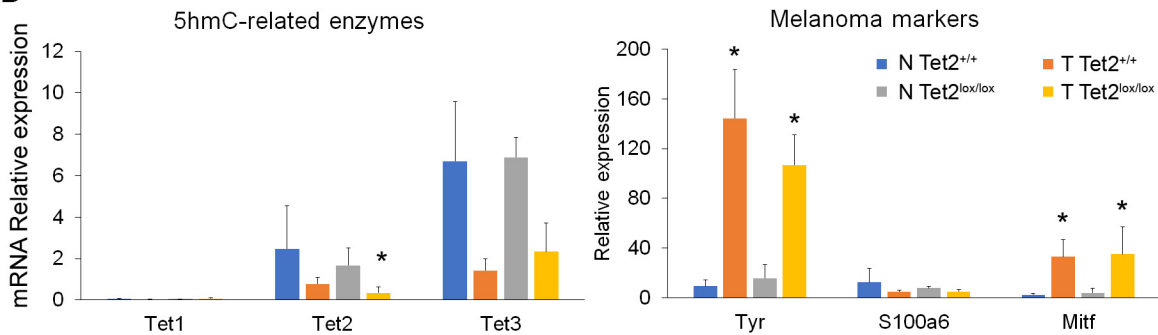

C

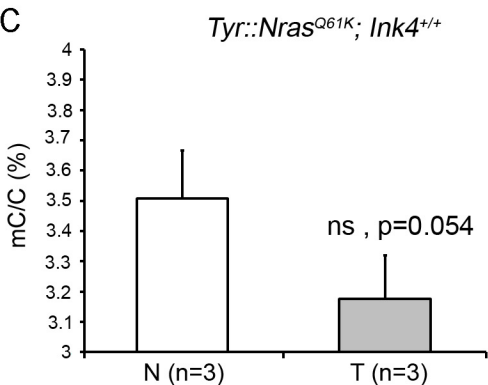

D

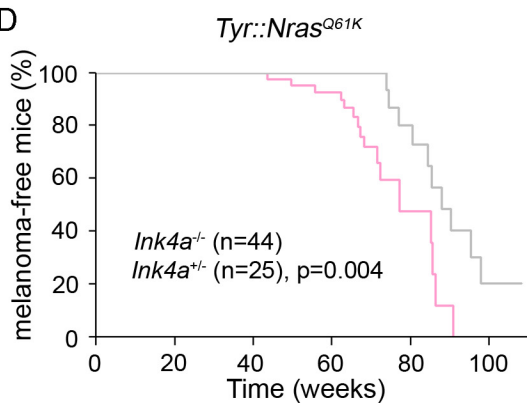

E

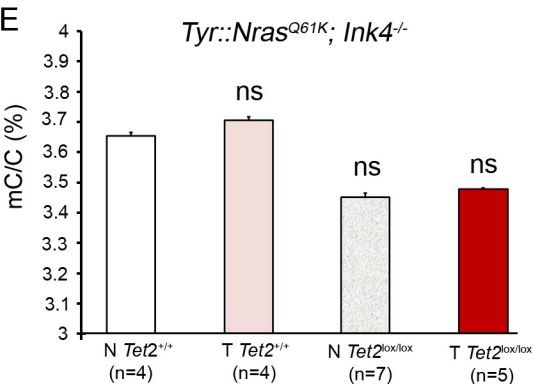

F

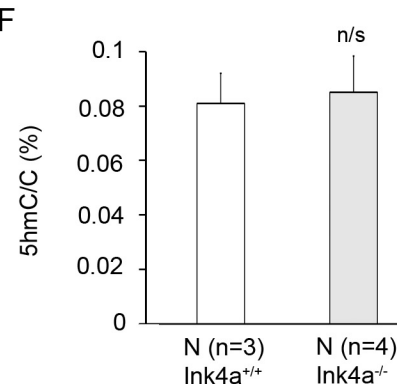

Suppl Figure S3

A

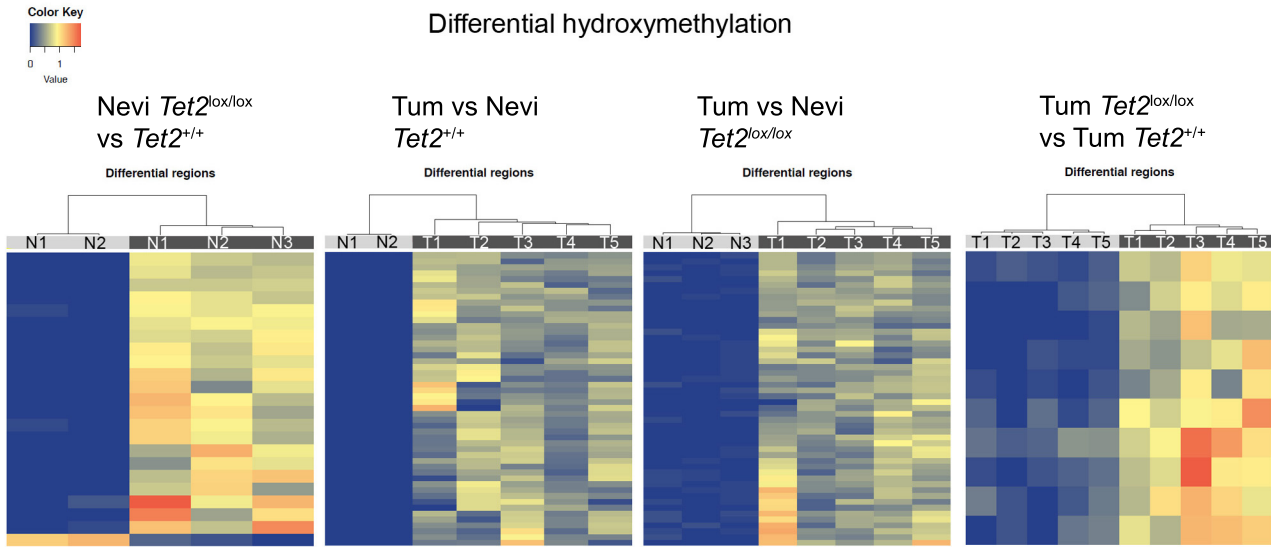

B

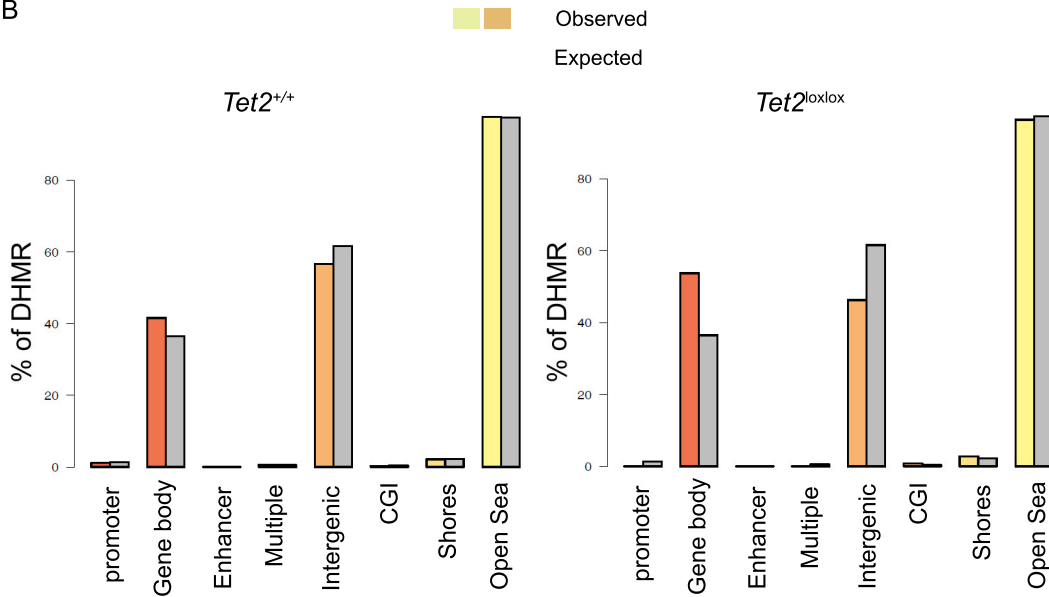

C

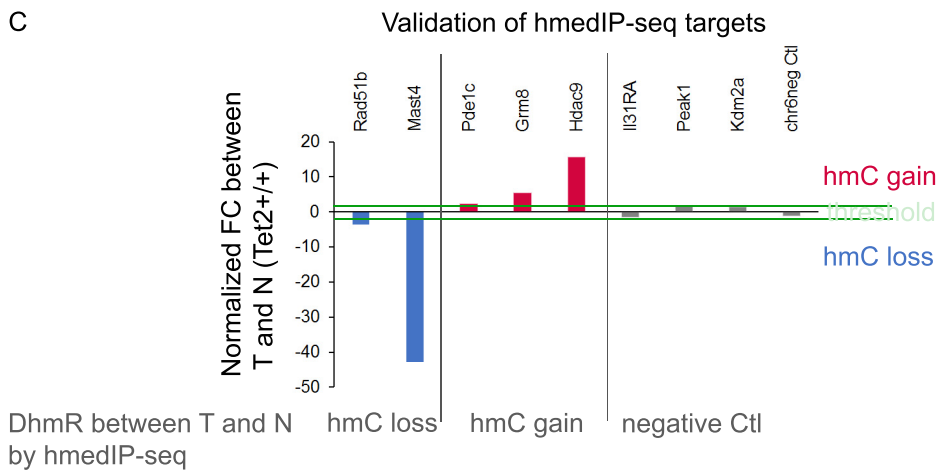

Supplement: NIHMS1006595-supplement-Suppl_Figures.pdf [file NIHMS1006595-supplement-Suppl_Figures.pdf]
